# Supplementary material for: Intratumoral combination therapy with poly(I:C) and resiquimod synergistically triggers tumor-associated macrophages for effective systemic antitumoral immunity
Source: PubMed Central journal article supplement — J Immunother Cancer. 2021 Sep 16;9(9):e002408. doi: 10.1136/jitc-2021-002408 (PMC8449972; doi:10.1136/jitc-2021-002408), 2021-09-16
Supplement: jitc-2021-002408supp001.pdf [file jitc-2021-002408supp001.pdf]

**Supplemental material:****Intratumoral combination therapy with poly(I:C) and resiquimod synergistically triggers tumor-associated macrophages for effective systemic antitumoral immunity****Authors:**

Clément Anfray<sup>1</sup>, Francesco Mainini<sup>1</sup>, Elisabeth Digifico<sup>1,2</sup>, Akihiro Maeda<sup>1</sup>, Marina Sironi<sup>1</sup>, Marco Erreni<sup>1</sup>, Achille Anselmo<sup>1</sup>, Aldo Ummarino<sup>1,2</sup>, Sara Gandoy<sup>3</sup>, Francisco Expósito<sup>4</sup>, Mirian Redrado<sup>4</sup>, Diego Serrano<sup>4</sup>, Alfonso Calvo<sup>4</sup>, Marvin Martens<sup>5</sup>, Susana Bravo<sup>6</sup>, Alberto Mantovani<sup>1,2</sup>, Paola Allavena<sup>1,2</sup> and Fernando Torres Andón<sup>1,3</sup>

**Affiliations:**

<sup>1</sup>IRCCS Istituto Clinico Humanitas, Rozzano, Italy

<sup>2</sup>Humanitas University, Pieve Emanuele, Italy

<sup>3</sup>Center for Research in Molecular Medicine and Chronic Diseases, Santiago de Compostela, Spain

<sup>4</sup>Department of Pathology, Anatomy and Physiology, University of Navarra, Pamplona, Spain

<sup>5</sup>Department of Bioinformatics, Maastricht University, Maastricht, Netherlands

<sup>6</sup>Health Research Institute of Santiago de Compostela, Santiago de Compostela, Spain

**This PDF file includes:**

Supplementary Methods

Supplementary Table 1-8

Supplementary Figures 1-11

## Supplementary methods

### Toxicity assay on CMT167 cells *in vitro*

CMT167 cancer cells ( $10^4$  cells/well) were cultured in 96 well black microplates (Corning) and treated with the indicated concentrations of drugs in appropriate cell culture medium. After indicated times, cell viability was assessed with the Alamar Blue Assay (Invitrogen) following manufacturer's protocol. Fluorescence intensity was measured with a Synergy H4 plate reader (BioTek), setting the  $\lambda_{\text{abs}}$  at 544 nm and the  $\lambda_{\text{em}}$  at 590 nm. Non-treated cells were used as controls and considered as 100% cell viability. The following equation was used to calculate the cell viability:

$$\text{Cell viability (\%)} = (1 - \text{fluorescence/control fluorescence}) * 100.$$

**Culture of bone marrow derived murine macrophages.** Bone-marrow derived murine macrophages (BMDMs) were obtained from femurs and tibias of healthy C57Bl/6 mice (Charles River). Briefly, bones were collected and washed in PBS (Sigma-Aldrich). The bone marrow was flushed with 1 ml 5% FBS RPMI using a 21G needle. The bone marrow was then homogenized by pipetting up and down several times, then passed through a  $0.7 \mu\text{m}$  filter to obtain a cell suspension. After centrifugation cells were suspended 5 min in ACK lysis buffer to eliminate red blood cells. Cells were washed in PBS then suspended in 5% FBS RPMI supplemented with murine M-CSF (Peprotech) at a concentration of 25 ng/ml and plated at a density of  $10^6$  cells/ml.

**Measurement of cytokine secretion and NO.** Cytokine secretion and NO production was measured by commercially available ELISA kits (murine CXCL10 and TNF- $\alpha$ , R&D Systems) and the Griess Reagent System (Promega), respectively, according to manufacturer's instructions (R&D Systems), using the supernatants collected 24 h after each indicated treatment.

**Cytotoxic activity of murine BMDMs towards murine CMT167 cells.** CMT167 cells, suspended in PBS, were stained with CellTrace™ Far Red 1 mM (Invitrogen) for 20 min at room temperature, then washed with complete RPMI. In 24 well plates (Corning),  $2 \times 10^4$  of these stained CMT167 cells were co-cultured with  $10^6$  murine BMDMs, previously exposed to TLRs agonists for 24 h, in fresh 5% FBS RPMI. After 2 days, cells were harvested and fixed for flow cytometry analysis using a FACS Canto II instrument (BD

Biosciences). For flow cytometry analysis, high fluorescent intensity events, corresponding to CMT167 cells, were counted, for 45 seconds of acquisition time. The values were normalized to the non-treated M0 macrophages.

**Multiplexed analysis of circulating cytokines.** Plasma samples were obtained at the end of the experiment. Levels of IL-6 and TNF- $\alpha$  were quantified in a customized multiplexed format with a murine-specific MILLIPLEX MAP kit (Merck-Millipore) according to the manufacturer's instructions and run on a Luminex MAGPIX system (Merck-Millipore).

**Immunohistochemistry for CD11c.** For immunohistochemistry, sections were hydrated and endogenous peroxidase was blocked with a 3% hydrogen peroxide solution. Antigen retrieval was done with Citrate buffer (pH= 6, 20 min at 98°C). After incubation with normal goat serum to block unspecific binding, anti-CD11c (1:50, D1V9Y Rabbit mAb #97585 Signaling) and the Envision system (Dako, Denmark), followed by DAB (3,3'-diaminobenzidine; Dako) and counterstaining with haematoxylin were applied prior to observation. IHC images were first scanned with the Aperio CS2 (Leica) scanner at 20x magnification. Images were visualized with the Image Scope (v12.1.05029, from Aperio, Leica) software. Image analysis was performed using Qupath (Bankhead, P. et al. QuPath: Open source software for digital pathology image analysis. Scientific Reports (2017). <https://doi.org/10.1038/s41598-017-17204-5>). Briefly, tumor tissue ROIs were manually selected to exclude necrotic areas and images were thresholded to generate the CD11c positive areas classifier. Quantification was performed using the ration CD11c/total tumor area per image.

**Supplementary Table 1.** List of antibodies used for multiplexed tumor immunophenotyping.

| Antibodies (Ref)        | Dilution     | Antigen retrieval        | Opal/Dilution |
|-------------------------|--------------|--------------------------|---------------|
| CK (CST,4279)           | 1:100        | TrisEDTA buffer, pH9     | 690/1:100     |
| CD31 (CST, 77699)       | 1:400        | Citrate buffer, pH6      | 570/1:600     |
| F4/80 (CST, 70076)      | 1:400        | Citrate buffer, pH6      | 650/1:600     |
| CD8 (Thermo, C8/14bb)   | 1:400        | PerkinElmer reagent, pH6 | 570           |
| CD4 (Dako, 4B12)        | Ready to use | Dako reagent, pH9        | 650           |
| Foxp3 (PE, OP7TL1001KT) | 1:300        | PerkinElmer reagent, pH6 | 620           |
| iNos (CST, 13120)       | 1:400        | Citrate buffer, pH6      | 650/1:50      |
| Arg1 (CST, 93668)       | 1:100        | Citrate buffer, pH6      | 570/1:50      |
| F4/80 (CST, 70076)      | 1:400        | Citrate buffer, pH6      | 520/1:50      |

**Supplementary Table 2.** List of antibodies and primers used for flow cytometry and RT-PCR.

| Antibodies          | Reference                                 | Dilution |
|---------------------|-------------------------------------------|----------|
| CD45-PerCP          | 557235; Clone 30-F11 (BD Biosciences)     | 1:200    |
| Cd11b-APC eFluor780 | 47-0112-82; Clone M1/70 (eBiosciences)    | 1:400    |
| CD11c-APC           | 550261; Clone HL3 (BD Biosciences)        | 1:100    |
| Ly-6G-PE-Cy7        | 552877; Clone 53-6.7 (BD Biosciences)     | 1:250    |
| F4/80-PE            | MCA497PE; Clone Cl:A3-1 (BioRad)          | 1:50     |
| MHCII-Alexa488      | 107616; Clone M5/114.15.2 (BioLegend)     | 1:500    |
| CD206-BV421         | 141717; Clone C068C2 (BioLegend)          | 1:500    |
| NK1.1-PE            | 12-5941-82; Clone PK136 (eBiosciences)    | 1:100    |
| CD3e-APC            | 17-0031-82; Clone 145-2C11 (eBiosciences) | 1:125    |
| CD4-FITC            | 100510; Clone RM4-5 (BioLegend)           | 1:150    |
| CD8a-PE-Cy7         | 552877; Clone 53-6.7 (BD Biosciences)     | 1:500    |
| CD69-PE-CF594       | 562455; H1.2F3 (BD Biosciences)           | 1:100    |
| PD1-PE              | 109104; Clone RMP1-30 (BioLegend)         | 1:50     |
| CD44-FITC           | 561859; Clone IM7 (BD Biosciences)        | 1:250    |
| CD62L-APC           | 553152; Clone MEL-14 (BD Biosciences)     | 1:250    |
| Primers             | Sequence 5' – 3'                          |          |
| GADPH for           | AACGACCCCTTCATTGAC                        |          |

|                   |                         |
|-------------------|-------------------------|
| GADPH rev         | TCCACGACATACTCAGCAC     |
| IRF7 for          | AAACCATAGAGGCACCCAAG    |
| IRF7 rev          | CCCAATAGCCAGTCTCCAAA    |
| INF- $\gamma$ for | ATGAACGCTACACACTGCATC   |
| INF- $\gamma$ rev | CCATCCTTTTGCCAGTTCCTC   |
| CCL5 for          | TACCATGAAGATCTCTGCAGCT  |
| CCL5 rev          | CTGCTGGTGTAGAAATACTCCT  |
| CXCL10 for        | GACGGTCCGCTGCAACTG      |
| CXCL10 rev        | CTTCCCTATGGCCCTCATTCT   |
| iNOS for          | CGAAACGCTTCACTTCCAA     |
| iNOS rev          | TGAGCCTATATTGCTGTGGCT   |
| Granzyme B for    | CCACTCTCGACCCTACATGG    |
| Granzyme B rev    | GGCCCCCAAAGTGACATTTATT  |
| Perforin for      | AGCACAAGTTCGTGCCAGG     |
| Perforin rev      | GCGTCTCTCATTAGGGAGTTTTT |

**Supplementary Table 3.** Number of identified proteins significantly changed by each treatment in the quantitative proteomic analysis (p-value  $\leq 0.05$ ).

| SWATH-MS         | Upregulated (vs. control) | Downregulated (vs. control) | Total (vs. control) |
|------------------|---------------------------|-----------------------------|---------------------|
| poly(I:C)        | 42                        | 46                          | 88                  |
| R837             | 90                        | 30                          | 120                 |
| R848             | 41                        | 26                          | 67                  |
| poly(I:C) + R837 | 86                        | 31                          | 117                 |
| Poly(I:C) + R848 | 113                       | 52                          | 165                 |

**Supplementary Table 4.** Number of proteins measured for each GO-term in the quantitative proteomic analysis (p-value  $\leq 0.05$ ).

| GO-term ID | GO-term title                     | Proteins in the GO-term | Measured proteins in the GO-term |
|------------|-----------------------------------|-------------------------|----------------------------------|
| GO:0006955 | immune response                   | 1500                    | 94                               |
| GO:0045087 | innate immune response            | 810                     | 66                               |
| GO:0002250 | adaptive immune response          | 489                     | 25                               |
| GO:0001906 | cell killing response to cytokine | 83                      | 14                               |
| GO:0034097 | Response to cytokine              | 766                     | 83                               |
| GO:0006979 | Response to oxidative stress      | 342                     | 45                               |
| GO:0006915 | apoptotic process                 | 809                     | 63                               |

**Supplementary Table 5.** Number of proteins identified in treated tumors.

| LC-MS            | Proteins Identified |
|------------------|---------------------|
| Control          | 1039                |
| poly(I:C)        | 1064                |
| R837             | 1046                |
| R848             | 1188                |
| poly(I:C) + R837 | 955                 |
| poly(I:C) + R848 | 1123                |

**Supplementary Table 6.** Number of proteins measured for each biological process in the qualitative proteomic analysis using FunRich (<http://www.funrich.org/>).

| Biological process                                  | Total number of proteins in the process | Number of proteins measured for each treatment in the biological process |           |      |      |                  |                  |
|-----------------------------------------------------|-----------------------------------------|--------------------------------------------------------------------------|-----------|------|------|------------------|------------------|
|                                                     |                                         | Control                                                                  | poly(I:C) | R837 | R848 | poly(I:C) + R837 | poly(I:C) + R848 |
| immune response                                     | 345                                     | 7                                                                        | 11        | 8    | 8    | 8                | 13               |
| innate immune response                              | 600                                     | 36                                                                       | 44        | 40   | 39   | 45               | 42               |
| adaptive immune response                            | 315                                     | 13                                                                       | 15        | 13   | 12   | 12               | 17               |
| Positive regulation of T cell mediated cytotoxicity | 56                                      | 4                                                                        | 7         | 5    | 4    | 7                | 7                |
| Positive regulation of cytokine secretion           | 67                                      | 4                                                                        | 4         | 4    | 2    | 4                | 5                |
| Cellular response to oxidative stress               | 132                                     | 9                                                                        | 9         | 9    | 2    | 9                | 8                |
| Apoptotic process                                   | 705                                     | 33                                                                       | 37        | 38   | 34   | 39               | 27               |
| Positive regulation of T cell migration             | 29                                      | 1                                                                        | 1         | 1    | 2    | 1                | 2                |

**Supplementary Table 7.** List of the up-regulated proteins in poly(I:C)+R848 treated tumors. FC, Fold change.

| Up-regulated                                                         |             |                   |          |          |            |
|----------------------------------------------------------------------|-------------|-------------------|----------|----------|------------|
| Protein                                                              | UniProt ID  | UniProt accession | p-value  | FC       | Log 2 (FC) |
| Alpha-1-acid glycoprotein 2                                          | A1AG2_MOUSE | P07361            | 0.020807 | 9.392404 | 3.231494   |
| Translationally-controlled tumor protein                             | TCTP_MOUSE  | P63028            | 0.001436 | 5.897405 | 2.56008    |
| Serine protease inhibitor A3N                                        | SPA3N_MOUSE | Q91WP6            | 0.04331  | 5.4535   | 2.447182   |
| Myristoylated alanine-rich C-kinase substrate                        | MARCS_MOUSE | P26645            | 0.011078 | 5.43516  | 2.442323   |
| Haptoglobin                                                          | HPT_MOUSE   | Q61646            | 0.002553 | 5.364626 | 2.423478   |
| Interferon-induced protein with tetratricopeptide repeats 2          | IFIT2_MOUSE | Q64112            | 0.043334 | 4.786776 | 2.259054   |
| E3 ubiquitin-protein ligase TRIP12                                   | TRIPC_MOUSE | G5E870            | 0.001927 | 4.444574 | 2.152045   |
| Reticulocalbin-1                                                     | RCN1_MOUSE  | Q05186            | 0.025571 | 4.382208 | 2.131658   |
| Osteopontin                                                          | OSTP_MOUSE  | P10923            | 0.007896 | 4.199009 | 2.070049   |
| Peptidyl-prolyl cis-trans isomerase FKBP3                            | FKBP3_MOUSE | Q62446            | 0.011224 | 4.17302  | 2.061092   |
| Neutrophilic granule protein                                         | NGP_MOUSE   | O08692            | 0.002169 | 4.119315 | 2.042404   |
| Tropomyosin alpha-1 chain                                            | TPM1_MOUSE  | P58771            | 0.027483 | 3.991526 | 1.99694    |
| Proteasome adapter and scaffold protein ECM29                        | ECM29_MOUSE | Q6PDI5            | 0.039021 | 3.984314 | 1.994331   |
| Interferon-induced protein with tetratricopeptide repeats 3          | IFIT3_MOUSE | Q64345            | 0.011041 | 3.511872 | 1.81224    |
| Interferon-activable protein 205-B                                   | IFI5B_MOUSE | P0DOV1            | 0.008885 | 3.436932 | 1.781121   |
| Rho GDP-dissociation inhibitor 2                                     | GDIR2_MOUSE | Q61599            | 0.016532 | 3.411876 | 1.770565   |
| Exportin-5                                                           | XPO5_MOUSE  | Q924C1            | 0.043807 | 3.165957 | 1.662641   |
| Interferon-inducible GTPase 1                                        | IIGP1_MOUSE | Q9QZ85            | 0.003423 | 3.164299 | 1.661886   |
| Parathymosin                                                         | PTMS_MOUSE  | Q9D0J8            | 0.026193 | 3.109102 | 1.636498   |
| Myosin regulatory light chain 12B                                    | ML12B_MOUSE | Q3THE2            | 0.037891 | 3.012188 | 1.590812   |
| V-type proton ATPase subunit E 1                                     | VATE1_MOUSE | P50518            | 0.03945  | 2.998174 | 1.584084   |
| E3 ubiquitin-protein ligase HUWE1                                    | HUWE1_MOUSE | Q7TMY8            | 0.0357   | 2.963595 | 1.567348   |
| Zinc-alpha-2-glycoprotein                                            | ZA2G_MOUSE  | Q64726            | 0.011613 | 2.891377 | 1.531757   |
| Signal transducer and activator of transcription 1                   | STAT1_MOUSE | P42225            | 0.001746 | 2.851739 | 1.511842   |
| Barrier-to-autointegration factor                                    | BAF_MOUSE   | O54962            | 0.020133 | 2.794917 | 1.482805   |
| Isoamyl acetate-hydrolyzing esterase 1 homolog                       | IAH1_MOUSE  | Q9DB29            | 0.034122 | 2.794759 | 1.482724   |
| Ubiquitin-like protein ISG15                                         | ISG15_MOUSE | Q64339            | 0.008337 | 2.742875 | 1.455689   |
| Septin-7                                                             | SEPT7_MOUSE | O55131            | 0.010371 | 2.735326 | 1.451713   |
| Y-box-binding protein 3                                              | YBOX3_MOUSE | Q9JKB3            | 0.013025 | 2.704532 | 1.435379   |
| Endoplasmic reticulum resident protein 44                            | ERP44_MOUSE | Q9D1Q6            | 0.019793 | 2.69248  | 1.428936   |
| H-2 class I histocompatibility antigen, D-B alpha chain              | HA11_MOUSE  | P01899            | 0.027918 | 2.684921 | 1.424879   |
| Protein canopy homolog 2                                             | CNPY2_MOUSE | Q9QXT0            | 0.000789 | 2.682453 | 1.423553   |
| Cathelicidin antimicrobial peptide                                   | CAMP_MOUSE  | P51437            | 0.007919 | 2.667416 | 1.415443   |
| Proteasome activator complex subunit 2                               | PSME2_MOUSE | P97372            | 0.005792 | 2.655506 | 1.408987   |
| Prolargin                                                            | PRELP_MOUSE | Q9JK53            | 0.009458 | 2.64374  | 1.40258    |
| Protein S100-A9                                                      | S10A9_MOUSE | P31725            | 0.002422 | 2.634305 | 1.397422   |
| NPC intracellular cholesterol transporter 2                          | NPC2_MOUSE  | Q9Z0J0            | 0.029353 | 2.615949 | 1.387334   |
| Nucleophosmin                                                        | NPM_MOUSE   | Q61937            | 0.022951 | 2.610909 | 1.384552   |
| Alpha-1-acid glycoprotein 1                                          | A1AG1_MOUSE | Q60590            | 0.008631 | 2.589415 | 1.372626   |
| Complement component 1 Q subcomponent-binding protein, mitochondrial | C1QB_MOUSE  | O35658            | 0.007318 | 2.518929 | 1.33281    |
| 40S ribosomal protein S28                                            | RS28_MOUSE  | P62858            | 0.017581 | 2.507979 | 1.326525   |
| Osteoclast-stimulating factor 1                                      | OSTF1_MOUSE | Q62422            | 0.019663 | 2.50497  | 1.324793   |
| Glutamine amidotransferase-like class 1 domain-containing protein 1  | GALD1_MOUSE | Q8BFQ8            | 0.013322 | 2.488572 | 1.315318   |
| Anamorsin                                                            | CPIN1_MOUSE | Q8WTY4            | 0.000562 | 2.47118  | 1.3052     |
| Histone H2A.V                                                        | H2AV_MOUSE  | Q3THW5            | 0.03043  | 2.395832 | 1.260527   |
| Keratin, type II cytoskeletal 5                                      | K2C5_MOUSE  | Q922U2            | 0.030186 | 2.390688 | 1.257426   |

|                                                               |             |        |          |          |          |
|---------------------------------------------------------------|-------------|--------|----------|----------|----------|
| Hemopexin                                                     | HEMO_MOUSE  | Q91X72 | 0.03061  | 2.386093 | 1.25465  |
| Nucleosome assembly protein 1-like 1                          | NP1L1_MOUSE | P28656 | 0.000131 | 2.385584 | 1.254342 |
| 60S acidic ribosomal protein P2                               | RLA2_MOUSE  | P99027 | 0.006066 | 2.377981 | 1.249737 |
| Nuclease-sensitive element-binding protein 1                  | YBOX1_MOUSE | P62960 | 0.003197 | 2.251179 | 1.170681 |
| Proteasome activator complex subunit 1                        | PSME1_MOUSE | P97371 | 0.003108 | 2.246398 | 1.167613 |
| Nuclear migration protein nudC                                | NUDC_MOUSE  | O35685 | 0.001598 | 2.216785 | 1.148469 |
| Importin subunit alpha-1                                      | IMA1_MOUSE  | P52293 | 0.013745 | 2.206371 | 1.141675 |
| Superoxide dismutase [Cu-Zn]                                  | SODC_MOUSE  | P08228 | 0.00948  | 2.194042 | 1.133591 |
| Actin-related protein 2/3 complex subunit 3                   | ARPC3_MOUSE | Q9JM76 | 0.011305 | 2.184241 | 1.127132 |
| Prosaposin                                                    | SAP_MOUSE   | Q61207 | 0.036501 | 2.176941 | 1.122302 |
| Tropomyosin alpha-4 chain                                     | TPM4_MOUSE  | Q6IRU2 | 0.023455 | 2.176285 | 1.121868 |
| Cathepsin S                                                   | CAT5_MOUSE  | O70370 | 0.043281 | 2.172302 | 1.119224 |
| RNA binding motif protein, X-linked-like-1                    | RMXL1_MOUSE | Q91VM5 | 0.001684 | 2.171622 | 1.118773 |
| Galectin-3-binding protein                                    | LG3BP_MOUSE | Q07797 | 0.013595 | 2.159094 | 1.110426 |
| Leukotriene A-4 hydrolase                                     | LKHA4_MOUSE | P24527 | 0.021819 | 2.151439 | 1.105302 |
| Acidic leucine-rich nuclear phosphoprotein 32 family member E | AN32E_MOUSE | P97822 | 0.005278 | 2.144605 | 1.100712 |
| Ubiquitin-conjugating enzyme E2 L3                            | UB2L3_MOUSE | P68037 | 0.00377  | 2.1316   | 1.091937 |
| Receptor expression-enhancing protein 5                       | REEP5_MOUSE | Q60870 | 0.016304 | 2.129456 | 1.090485 |
| Programmed cell death protein 5                               | PDCD5_MOUSE | P56812 | 0.028031 | 2.109901 | 1.077175 |
| Small nuclear ribonucleoprotein Sm D2                         | SMD2_MOUSE  | P62317 | 0.003308 | 2.094972 | 1.066931 |
| DnaJ homolog subfamily C member 8                             | DNJC8_MOUSE | Q6NZB0 | 0.012186 | 2.091372 | 1.064449 |
| Dipeptidyl peptidase 1                                        | CATC_MOUSE  | P97821 | 0.026786 | 2.072054 | 1.051062 |
| Apolipoprotein E                                              | APOE_MOUSE  | P08226 | 0.027833 | 1.966694 | 0.975773 |
| Proteasome subunit beta type-10                               | PSB10_MOUSE | O35955 | 0.000389 | 1.948096 | 0.962064 |
| Apoptosis inhibitor 5                                         | API5_MOUSE  | O35841 | 0.024266 | 1.938637 | 0.955043 |
| Tropomyosin alpha-3 chain                                     | TPM3_MOUSE  | P21107 | 0.018775 | 1.921747 | 0.942418 |
| N-acetylglucosamine-6-sulfatase                               | GNS_MOUSE   | Q8BFR4 | 0.013639 | 1.89016  | 0.918508 |
| U1 small nuclear ribonucleoprotein A                          | SNRPA_MOUSE | Q62189 | 0.020782 | 1.875887 | 0.907573 |
| Nucleolar RNA helicase 2                                      | DDX21_MOUSE | Q9JIK5 | 0.013623 | 1.854313 | 0.890884 |
| Collagen alpha-1(I) chain                                     | CO1A1_MOUSE | P11087 | 0.045549 | 1.849683 | 0.887278 |
| Transforming growth factor-beta-induced protein ig-h3         | BGH3_MOUSE  | P82198 | 0.017169 | 1.845052 | 0.883661 |
| U2 small nuclear ribonucleoprotein A'                         | RU2A_MOUSE  | P57784 | 0.005144 | 1.832036 | 0.873448 |
| Lumican                                                       | LUM_MOUSE   | P51885 | 0.011477 | 1.82844  | 0.870613 |
| Guanylate-binding protein 2                                   | GBP2_MOUSE  | Q9Z0E6 | 0.033171 | 1.817772 | 0.862171 |
| Leucine-rich repeat-containing protein 59                     | LRC59_MOUSE | Q922Q8 | 0.004851 | 1.779278 | 0.831292 |
| Far upstream element-binding protein 1                        | FUBP1_MOUSE | Q91WJ8 | 0.006606 | 1.774477 | 0.827394 |
| Acid ceramidase                                               | ASAH1_MOUSE | Q9WV54 | 0.03543  | 1.77339  | 0.82651  |
| Ras GTPase-activating protein-binding protein 1               | G3BP1_MOUSE | P97855 | 0.04528  | 1.748435 | 0.806064 |
| Calumenin                                                     | CALU_MOUSE  | O35887 | 0.015917 | 1.726612 | 0.787944 |
| rRNA 2'-O-methyltransferase fibrillarin                       | FBRL_MOUSE  | P35550 | 0.041236 | 1.721726 | 0.783855 |
| RNA-binding protein EWS                                       | EWS_MOUSE   | Q61545 | 0.023194 | 1.706665 | 0.77118  |
| Tryptophan--tRNA ligase, cytoplasmic                          | SYWC_MOUSE  | P32921 | 0.018088 | 1.699466 | 0.765081 |
| Transcription intermediary factor 1-beta                      | TIF1B_MOUSE | Q62318 | 0.027087 | 1.690199 | 0.757193 |
| Eukaryotic translation initiation factor 3 subunit J-B        | EI3JB_MOUSE | Q66J56 | 0.018771 | 1.679098 | 0.747686 |
| Thioredoxin                                                   | THIO_MOUSE  | P10639 | 0.012732 | 1.672173 | 0.741724 |
| Nucleobindin-1                                                | NUCB1_MOUSE | Q02819 | 0.020634 | 1.657199 | 0.728747 |
| 60S acidic ribosomal protein P1                               | RLA1_MOUSE  | P47955 | 0.001853 | 1.654715 | 0.726583 |
| Fibronectin                                                   | FINC_MOUSE  | P11276 | 0.02132  | 1.631826 | 0.706487 |
| Dynactin subunit 2                                            | DCTN2_MOUSE | Q99KJ8 | 0.019084 | 1.631743 | 0.706414 |
| Heterogeneous nuclear ribonucleoprotein K                     | HNRPK_MOUSE | P61979 | 0.00284  | 1.612236 | 0.689063 |
| Cytochrome c, somatic                                         | CYC_MOUSE   | P62897 | 0.022466 | 1.60958  | 0.686685 |
| Transgelin-2                                                  | TAGL2_MOUSE | Q9WVA4 | 0.030998 | 1.608983 | 0.686149 |
| 40S ribosomal protein S21                                     | RS21_MOUSE  | Q9CQR2 | 0.049559 | 1.606055 | 0.683521 |
| Splicing factor U2AF 65 kDa subunit                           | U2AF2_MOUSE | P26369 | 0.003307 | 1.599522 | 0.67764  |
| Protein NDRG1                                                 | NDRG1_MOUSE | Q62433 | 0.041428 | 1.574425 | 0.654825 |
| Acylamino-acid-releasing enzyme                               | APEH_MOUSE  | Q8R146 | 0.020654 | 1.56329  | 0.644586 |
| 26S proteasome non-ATPase regulatory subunit 7                | PSMD7_MOUSE | P26516 | 0.016838 | 1.556534 | 0.638337 |

|                                                               |             |        |          |          |          |
|---------------------------------------------------------------|-------------|--------|----------|----------|----------|
| Protein disulfide-isomerase A3                                | PDIA3_MOUSE | P27773 | 0.043526 | 1.526871 | 0.610578 |
| 40S ribosomal protein S19                                     | RS19_MOUSE  | Q9CZX8 | 0.046784 | 1.514576 | 0.598914 |
| Pro-cathepsin H                                               | CATH_MOUSE  | P49935 | 0.029448 | 1.499388 | 0.584374 |
| Tumor protein D52                                             | TPD52_MOUSE | Q62393 | 0.01001  | 1.498682 | 0.583694 |
| Elongation factor 1-beta                                      | EF1B_MOUSE  | O70251 | 0.025011 | 1.498187 | 0.583218 |
| Tubulin beta-5 chain                                          | TBB5_MOUSE  | P99024 | 0.03858  | 1.445894 | 0.531962 |
| Protein S100-A4                                               | S10A4_MOUSE | P07091 | 0.000992 | 1.421797 | 0.507715 |
| Serine/arginine-rich splicing factor 2                        | SRSF2_MOUSE | Q62093 | 0.013223 | 1.418617 | 0.504485 |
| Far upstream element-binding protein 2                        | FUBP2_MOUSE | Q3U0V1 | 0.022634 | 1.286285 | 0.363211 |
| Acidic leucine-rich nuclear phosphoprotein 32 family member A | AN32A_MOUSE | O35381 | 0.012963 | 1.233492 | 0.302748 |

**Supplementary Table 8.** List of the down-regulated proteins in poly(I:C)+R848 treated tumors. FC, Fold change.

| Down-regulated                                       |             |                   |          |             |            |
|------------------------------------------------------|-------------|-------------------|----------|-------------|------------|
| Protein                                              | UniProt ID  | UniProt accession | p-value  | FC          | Log 2 (FC) |
| Proteasome subunit beta type-5                       | PSB5_MOUSE  | O55234            | 0.010934 | 0.27413588  | -1.86704   |
| Endophilin-B2                                        | SHLB2_MOUSE | Q8R3V5            | 0.034988 | 0.344444925 | -1.53765   |
| Clusterin                                            | CLUS_MOUSE  | Q06890            | 0.0107   | 0.372689943 | -1.42395   |
| Glutathione S-transferase A4                         | GSTA4_MOUSE | P24472            | 0.038814 | 0.374923416 | -1.41533   |
| Latexin                                              | LXN_MOUSE   | P70202            | 0.011818 | 0.437030068 | -1.1942    |
| Eukaryotic translation initiation factor 3 subunit B | EIF3B_MOUSE | Q8JZQ9            | 0.026744 | 0.452935616 | -1.14262   |
| GTP-binding protein SAR1a                            | SAR1A_MOUSE | P36536            | 0.021724 | 0.465821112 | -1.10215   |
| Synaptic vesicle membrane protein VAT-1 homolog      | VAT1_MOUSE  | Q62465            | 0.021411 | 0.517886354 | -0.94929   |
| Serine hydroxymethyltransferase, mitochondrial       | GLYM_MOUSE  | Q9CZN7            | 0.00429  | 0.521725866 | -0.93864   |
| Receptor of activated protein C kinase 1             | RACK1_MOUSE | P68040            | 0.034166 | 0.53882722  | -0.89211   |
| Pyruvate kinase PKM                                  | KPYM_MOUSE  | P52480            | 0.037207 | 0.545258131 | -0.87499   |
| Serpin B6                                            | SPB6_MOUSE  | Q60854            | 0.031656 | 0.568080208 | -0.81583   |
| U6 snRNA-associated Sm-like protein LSM3             | LSM3_MOUSE  | P62311            | 0.032094 | 0.575596616 | -0.79687   |
| Cystatin-B                                           | CYTB_MOUSE  | Q62426            | 0.027081 | 0.596730078 | -0.74485   |
| Fascin                                               | FSCN1_MOUSE | Q61553            | 0.006595 | 0.602440911 | -0.73111   |
| Peroxiredoxin-1                                      | PRDX1_MOUSE | P35700            | 0.032045 | 0.61244558  | -0.70735   |
| Adenosylhomocysteinase                               | SAHH_MOUSE  | P50247            | 0.024563 | 0.613972563 | -0.70375   |
| L-lactate dehydrogenase A chain                      | LDHA_MOUSE  | P06151            | 0.033025 | 0.638400728 | -0.64747   |
| 40S ribosomal protein S23                            | RS23_MOUSE  | P62267            | 0.0126   | 0.650476837 | -0.62043   |
| Rho GDP-dissociation inhibitor 1                     | GDIR1_MOUSE | Q99PT1            | 0.01772  | 0.657149344 | -0.60571   |
| UTP--glucose-1-phosphate uridylyltransferase         | UGPA_MOUSE  | Q91ZJ5            | 0.018093 | 0.664523742 | -0.58961   |
| 4-trimethylaminobutyraldehyde dehydrogenase          | AL9A1_MOUSE | Q9JLJ2            | 0.018487 | 0.66485955  | -0.58888   |
| 40S ribosomal protein S3                             | RS3_MOUSE   | P62908            | 0.023169 | 0.665478412 | -0.58754   |
| Elongation factor 2                                  | EF2_MOUSE   | P58252            | 0.00058  | 0.673322333 | -0.57063   |
| Bifunctional glutamate/proline--tRNA ligase          | SYEP_MOUSE  | Q8CGC7            | 0.023933 | 0.676107519 | -0.56468   |
| Isocitrate dehydrogenase [NADP], mitochondrial       | IDHP_MOUSE  | P54071            | 0.023137 | 0.69185014  | -0.53147   |
| Heat shock protein HSP 90-alpha                      | HS90A_MOUSE | P07901            | 0.039732 | 0.697124865 | -0.52051   |
| Inositol monophosphatase 1                           | IMPA1_MOUSE | O55023            | 0.035862 | 0.702724484 | -0.50897   |
| Fatty acid-binding protein, epidermal                | FABP5_MOUSE | Q05816            | 0.015142 | 0.713853283 | -0.4863    |
| 60S ribosomal protein L6                             | RL6_MOUSE   | P47911            | 0.011992 | 0.723128491 | -0.46768   |
| D-3-phosphoglycerate dehydrogenase                   | SERA_MOUSE  | Q61753            | 0.03453  | 0.726419541 | -0.46113   |
| 60S ribosomal protein L11                            | RL11_MOUSE  | Q9CXW4            | 0.002984 | 0.738353441 | -0.43762   |
| Eukaryotic translation initiation factor 2 subunit 1 | IF2A_MOUSE  | Q6ZWX6            | 0.01606  | 0.740392567 | -0.43364   |
| 60S ribosomal protein L14                            | RL14_MOUSE  | Q9CR57            | 0.015354 | 0.741438123 | -0.4316    |
| C-1-tetrahydrofolate synthase, cytoplasmic           | C1TC_MOUSE  | Q922D8            | 0.042916 | 0.741737805 | -0.43102   |
| Aldose reductase                                     | ALDR_MOUSE  | P45376            | 0.000337 | 0.745492421 | -0.42373   |

|                                                   |             |        |          |             |          |
|---------------------------------------------------|-------------|--------|----------|-------------|----------|
| Cullin-associated NEDD8-dissociated protein 1     | CAND1_MOUSE | Q6ZQ38 | 0.011313 | 0.748169437 | -0.41856 |
| Phosphoglycerate kinase 1                         | PGK1_MOUSE  | P09411 | 0.046259 | 0.750602447 | -0.41388 |
| Heat shock protein HSP 90-beta                    | HS90B_MOUSE | P11499 | 0.027074 | 0.750977846 | -0.41316 |
| 6-phosphogluconate dehydrogenase, decarboxylating | 6PGD_MOUSE  | Q9DCD0 | 0.00156  | 0.753605028 | -0.40812 |
| T-complex protein 1 subunit theta                 | TCPQ_MOUSE  | P42932 | 0.023617 | 0.755901509 | -0.40373 |
| 60S ribosomal protein L27                         | RL27_MOUSE  | P61358 | 0.016738 | 0.758046368 | -0.39964 |
| Elongation factor 1-gamma                         | EF1G_MOUSE  | Q9D8N0 | 0.037801 | 0.769735444 | -0.37757 |
| 40S ribosomal protein S9                          | RS9_MOUSE   | Q6ZWN5 | 0.025805 | 0.771736999 | -0.37382 |
| Clathrin heavy chain 1                            | CLH1_MOUSE  | Q68FD5 | 0.018433 | 0.777335065 | -0.36339 |
| Bifunctional purine biosynthesis protein PURH     | PUR9_MOUSE  | Q9CWJ9 | 0.036711 | 0.785273148 | -0.34873 |
| Dihydropyrimidinase-related protein 2             | DPYL2_MOUSE | O08553 | 0.030983 | 0.785989593 | -0.34742 |
| Ubiquitin carboxyl-terminal hydrolase 14          | UBP14_MOUSE | Q9JMA1 | 0.005999 | 0.787665353 | -0.34435 |
| Isocitrate dehydrogenase [NADP] cytoplasmic       | IDHC_MOUSE  | O88844 | 0.048243 | 0.798599903 | -0.32446 |
| Polyadenylate-binding protein 1                   | PABP1_MOUSE | P29341 | 0.027583 | 0.810031027 | -0.30395 |
| 60S ribosomal protein L18                         | RL18_MOUSE  | P35980 | 0.013615 | 0.855088592 | -0.22585 |
| Actin-related protein 2/3 complex subunit 1B      | ARC1B_MOUSE | Q9WV32 | 0.00622  | 0.866661129 | -0.20646 |

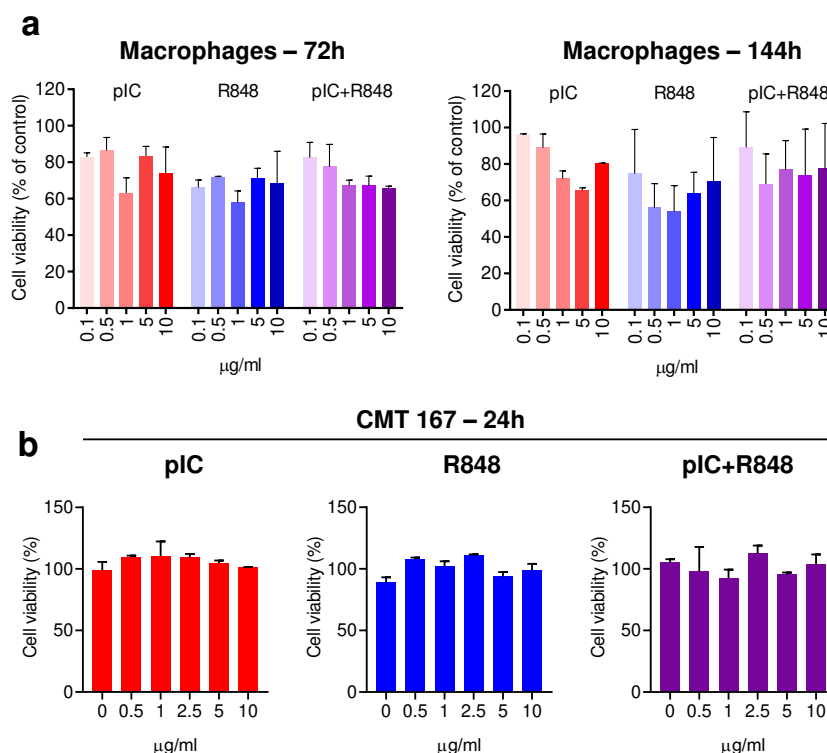

**Supplementary Figure 1. Toxicological evaluation *in vitro* of poly(I:C) and R848, alone or combined, towards CMT167 cells or primary human monocyte derived macrophages exposed at longer times.** (a) Cell viability (Alamar Blue) of M0 macrophages exposed 72 h or 144 h to the drugs. M0 macrophages were isolated from peripheral blood mononuclear cells (PBMCs) stimulated with 25 ng/mL of rhM-CSF and cultured *in vitro* for 6 days (N=2). (b) Cell viability (Alamar Blue) of CMT167 cells exposed 24 h to the drugs (N=3). Values represent mean  $\pm$  s.e.m. Statistical comparison was performed using a one-way ANOVA test. No statistically significant differences were found for any group of treatment. pIC, poly(I:C); R848, resiquimod.

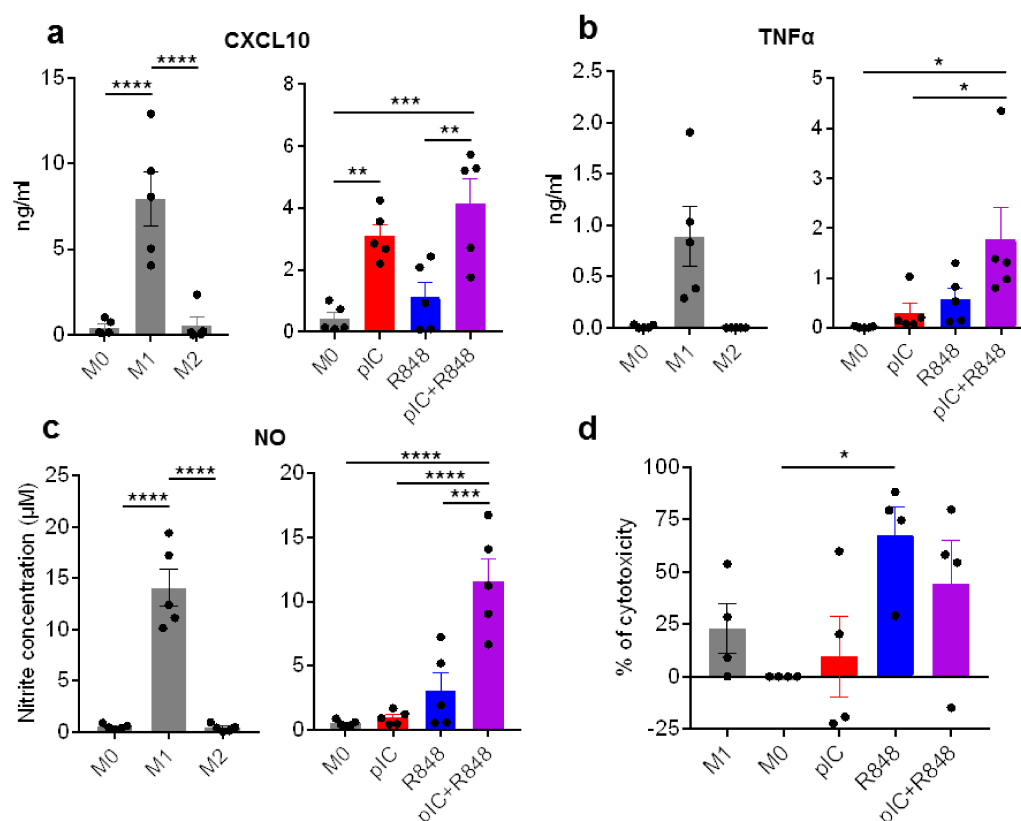

**Supplementary Figure 2. Immunomodulatory evaluation *in vitro* of poly(I:C) and R848, alone or combined, using primary murine macrophages.** Control macrophages were *in vitro* differentiated from murine bone-marrow derived macrophages (BMDMs) stimulated with 25 ng/mL of rmM-CSF for 5 days, and then polarized with 100 ng/mL of LPS and 50 ng/mL of IFN $\gamma$  (M1), 20 ng/mL of IL-4 (M2) or medium (M0) for 24 h. Each dot corresponds to distinct murine macrophages. ELISA evaluation of (a) CXCL10 and (b) TNF- $\alpha$  and (c) NO secretion by murine BMDMs exposed 24 h to the TLR agonists. (d) Cytotoxic activity of TLR-treated-BMDMs towards murine CMT167 cancer cells. BMDMs were treated for 24 h with TLR agonists, co-cultured for 48 h with cancer cells and analyzed by FACS, as represented in Fig. 1e (original manuscript). Bars represent mean  $\pm$  s.e.m. Statistical comparison was performed using a one-way ANOVA followed by a Tukey's multiple comparison test. Statistically significant differences are represented as \* ( $p < 0.05$ ), \*\* ( $p < 0.01$ ), \*\*\* ( $p < 0.001$ ) and \*\*\*\* ( $p < 0.0001$ ). pIC, poly(I:C); R848, resiquimod.

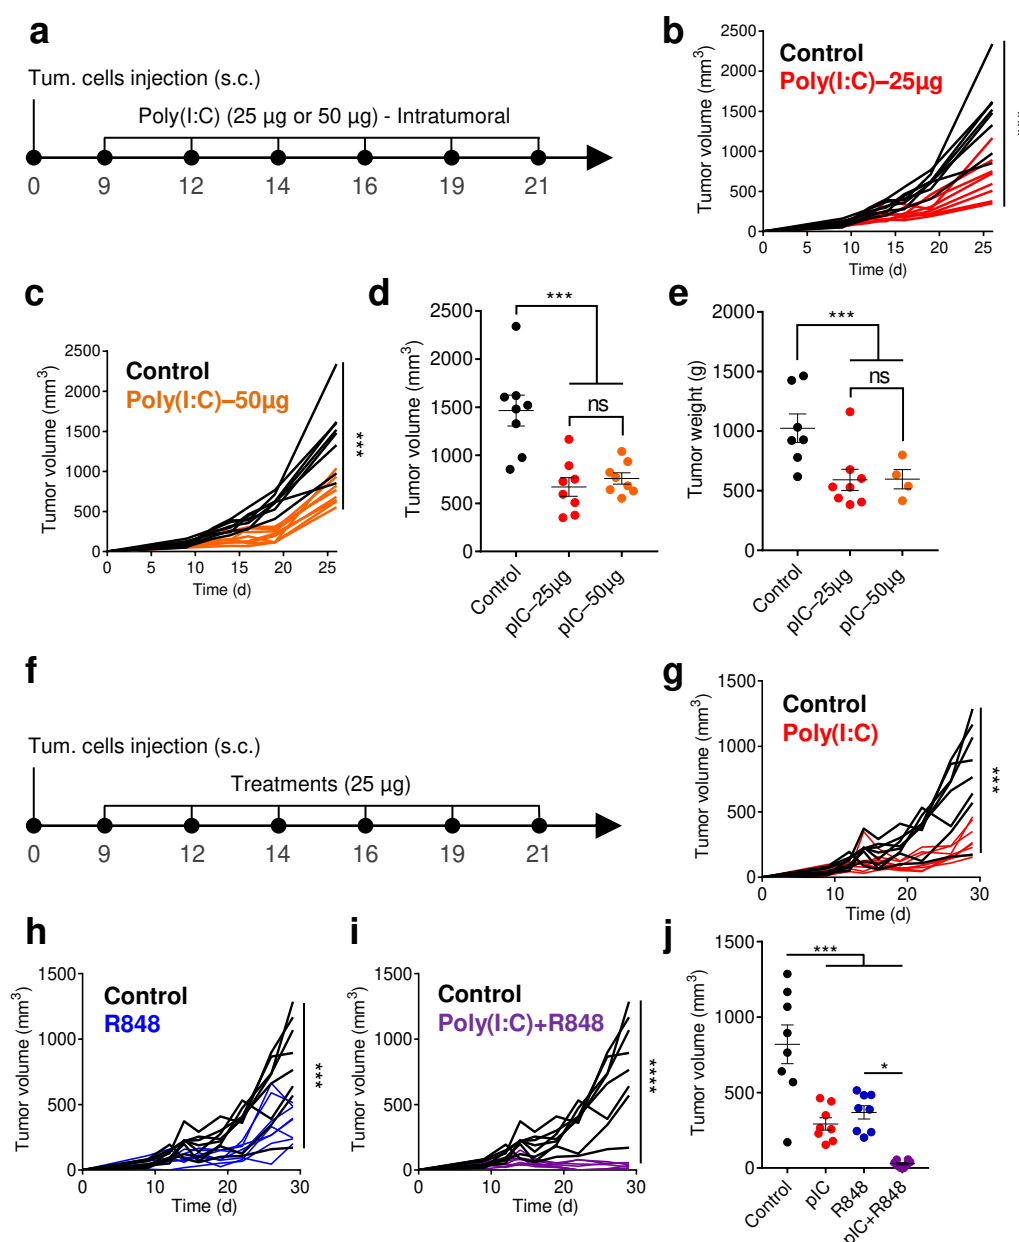

**Supplementary Figure 3. Antitumoral efficacy of intratumoral injections of poly(I:C) and R848, alone or combined, in the immunocompetent lung cancer murine model CMT167. (a-e)** Comparison of the antitumoral efficacy of two different doses of poly(I:C) applied intratumorally in the immunocompetent lung cancer murine model CMT167. **(a)** Schematic representation of the experimental protocol. **(b-e)** Evolution of tumor growth of mice treated with **(b)** 6x25  $\mu$ g of poly(I:C) and **(c)** 6x50  $\mu$ g of poly(I:C). **(d)** Comparison of tumor volume at sacrifice. **(e)** Comparison of tumor weight at sacrifice. **(f-j)** Antitumoral

efficacy of intratumoral injections of poly(I:C) and R848, alone or combined, in the immunocompetent lung cancer murine model CMT167. **(f)** Schematic representation of the experimental protocol. CMT167 cells were injected subcutaneously in the flank. From day 9 to day 21, mice received intratumoral delivery of TLR agonists (25 µg) as monotherapy or in combination. Control mice received only saline. **(g–j)** Evolution of tumor growth of mice treated with **(g)** poly(I:C), **(h)** R848 and **(i)** combination of Poly(I:C)+R848. **(j)** Comparison of tumor volume at sacrifice. Bars represent mean ± s.e.m ; N=8 per group. Statistical comparison was performed using a one-way ANOVA followed by a Tuckey's multiple comparison test. Statistically significant differences are represented as \*\*\*( $p<0.001$ ) and \*\*\*\*( $p<0.0001$ ) vs control; ns, not significant. pIC, poly(I:C); R848, resiquimod.

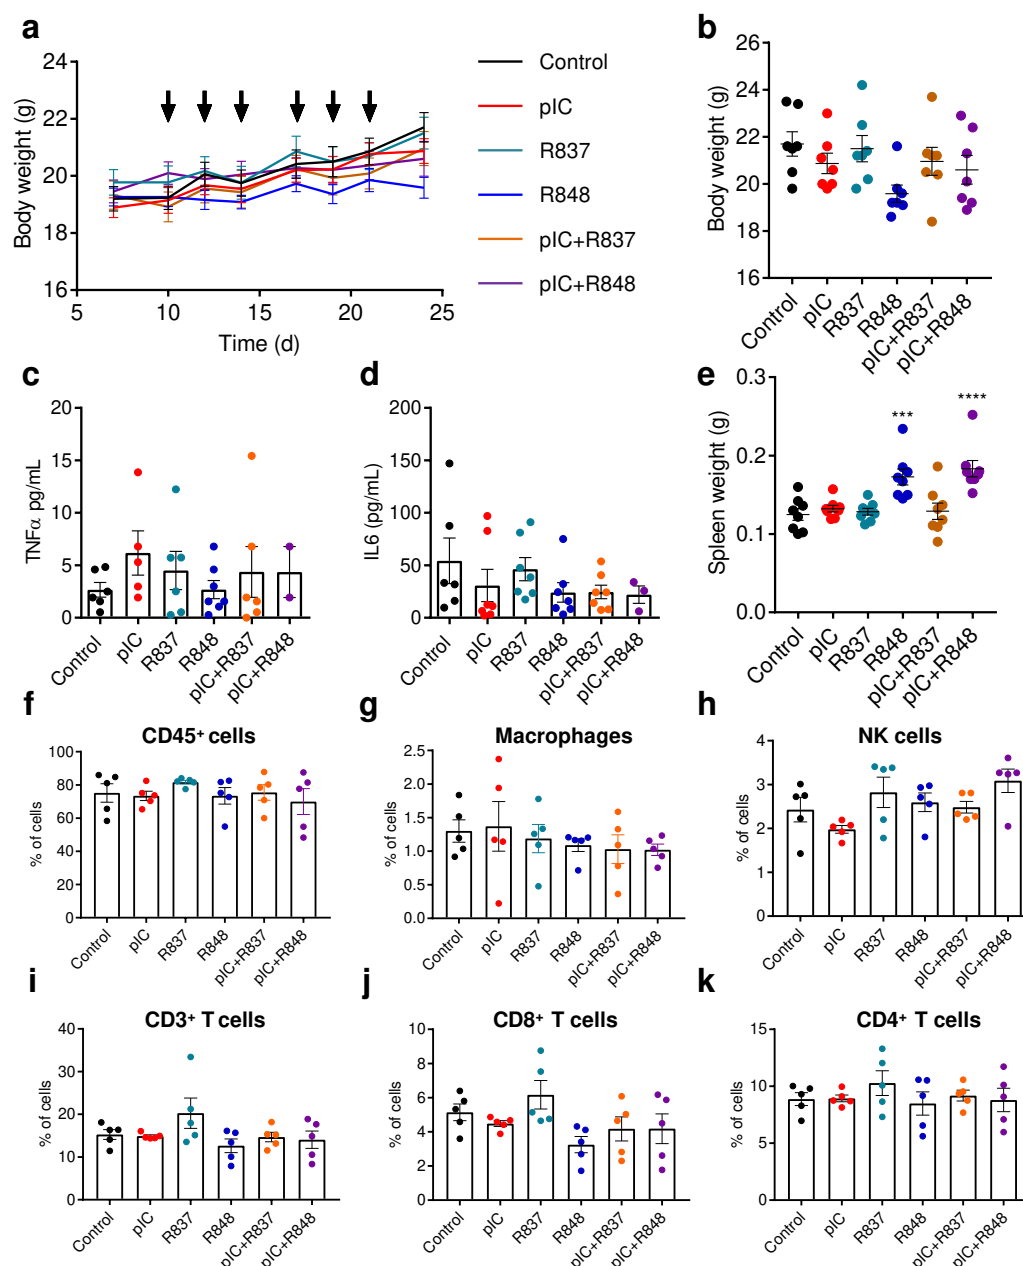

**Supplementary Figure 4. Lack of toxicity of intratumoral administration of TLR agonists alone or in combination.** Mice bearing CMT167 tumors were treated intratumorally with 6 injections of TLRs agonists (total of 150  $\mu$ g/mouse) alone or in combination. **(a)** Weight curves of tumor-bearing mice treated with 6 doses of TLRs agonists (arrows). N=8 per group. **(b)** Weight of individual mice, represented by points, at day 24. **(c-d)** Quantification of the circulation levels of **(c)** TNF- $\alpha$  and **(d)** IL-6 in the blood at day 24. **(e)** Weight of spleens at day 24. The spleen tissue was analyzed with flow cytometry for the proportion of **(f)** leukocytes (CD45<sup>+</sup>) in living cells, **(g)** macrophages (CD45<sup>+</sup>, CD11b<sup>+</sup>, F4/80<sup>+</sup>), **(h)** NK cells (CD45<sup>+</sup>, NK1.1<sup>+</sup>), **(i)** T lymphocytes (CD45<sup>+</sup>, CD3<sup>+</sup>), **(j)** CD8<sup>+</sup> T lymphocytes and **(k)**

CD4<sup>+</sup> T lymphocytes. Bars represent mean  $\pm$  s.e.m. Statistical comparison was performed using a one-way ANOVA followed by a Dunnett's multiple comparison test. Statistically significant differences are represented as \*\*\*( $p < 0.001$ ) and \*\*\*\*( $p < 0.0001$ ) vs control. pIC, poly(I:C); R837, imiquimod; R848, resiquimod.

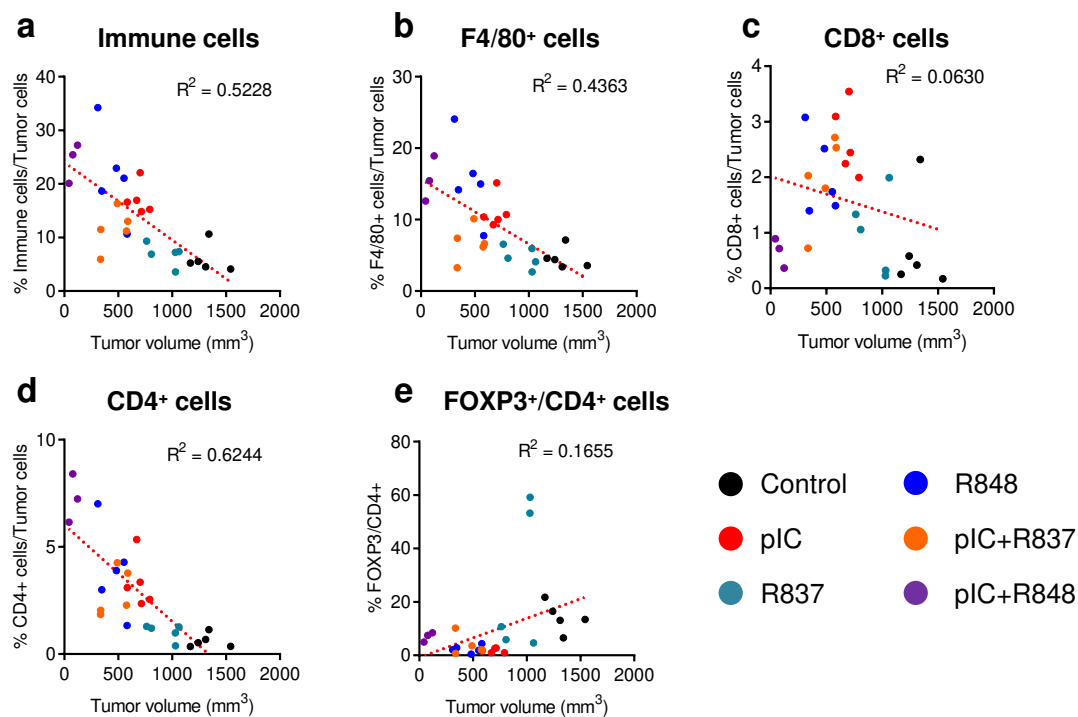

**Supplementary Figure 5. Multiplexed immunofluorescence analysis of immune infiltration in CMT167 tumors treated with TLR-agonist monotherapies or combinations.** Correlation between tumor volume and immunofluorescence analysis quantification of (a) total immune cells, (b) macrophages (F4/80<sup>+</sup>), (c) CD8<sup>+</sup> T cells, (d) CD4<sup>+</sup> T cells and (e) FOXP3<sup>+</sup>/CD4<sup>+</sup> T cells in treated tumors. Each dot corresponds to a single animal. pIC, poly(I:C); R837, imiquimod; R848, resiquimod.

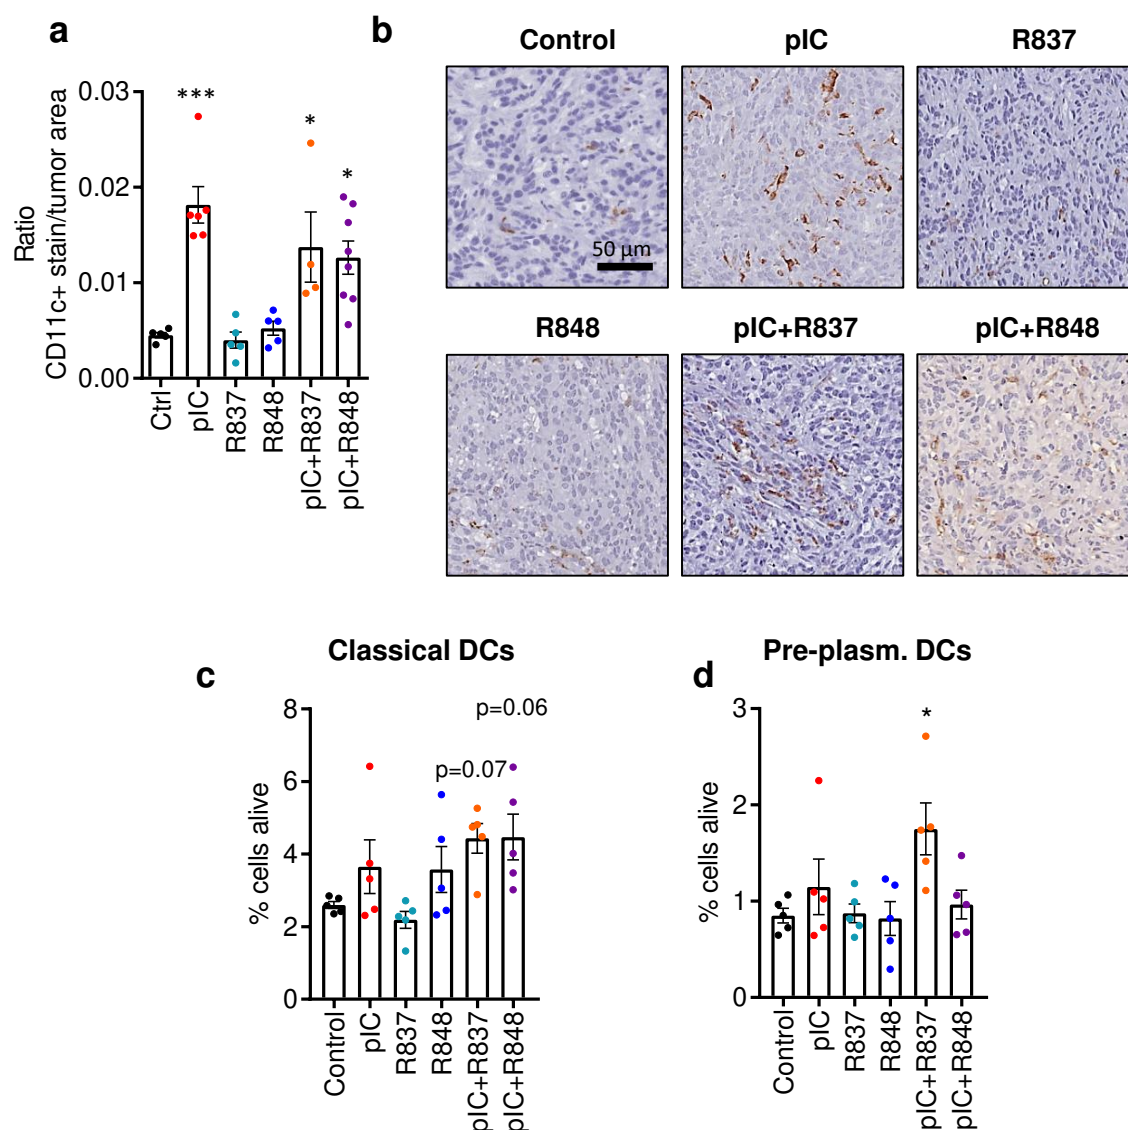

**Supplementary Figure 6. Analysis of dendritic cells infiltration in CMT167 tumors treated with TLR-agonist monotherapies or combinations.** (a) Immunohistochemistry quantification for CD11c in CMT167 tumors i.t. treated with 6 injections of TLR agonists and (b) representative pictures from tumors stained for CD11c. In CMT167 tumors i.t. treated with 2 injections of TLR agonists, intratumoral proportion of (c) classical dendritic cells ( $CD11b^+$ ,  $CD11c^{int}$ ) and (d) pre-plasmacytoid dendritic cells ( $CD11b^-$ ,  $CD11c^+$ ) were analysed with flow cytometry. Bars represent mean  $\pm$  s.e.m. Statistical comparison was performed using a one-way ANOVA followed by a Dunnett's multiple comparison test. Statistically significant differences are represented as \* ( $p < 0.05$ ) and \*\*\* ( $p < 0.001$ ) vs control. pIC, poly(I:C); R837, imiquimod; R848, resiquimod.

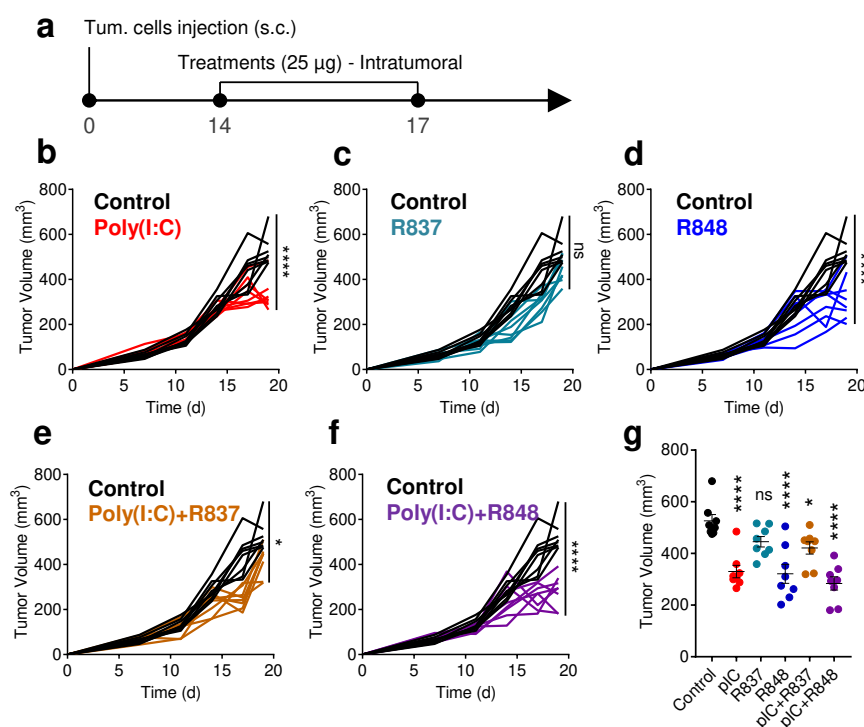

**Supplementary Figure 7. Antitumoral efficacy of poly(I:C), R837 and R848, alone or combined, applied intratumorally (2 injections) in the immunocompetent lung cancer murine model CMT167. (a)** Schematic representation of the experimental protocol. **(b–f)** Evolution of tumor growth of mice treated with **(b)** poly(I:C), **(c)** R837, **(d)** R848, **(e)** combination of poly(I:C) and R837 and **(f)** combination of poly(I:C) and R848. **(g)** Comparison of the tumor volume at sacrifice. Bars represent mean  $\pm$  s.e.m ; N=8 per group. Statistical comparison was performed using a one-way ANOVA followed by a Tukey's multiple comparison test. Statistically significant differences are represented as \* ( $p < 0.05$ ) and \*\*\*\* ( $p < 0.001$ ) vs control; ns, not significant. pIC, poly(I:C); R837, imiquimod; R848, resiquimod.

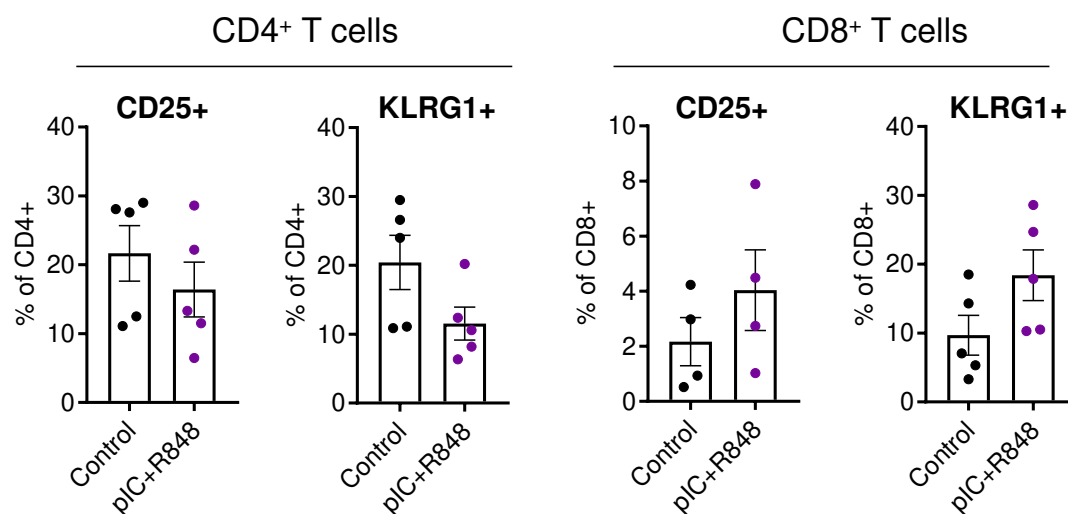

**Supplementary Figure 8. FACS analysis of activation markers in CD4<sup>+</sup> and CD8<sup>+</sup> T cells.** CMT167 tumors i.t. treated with 2 injections of poly (I:C)+R848 were analyzed with flow cytometry for the proportion of CD25<sup>+</sup> and KLRG1<sup>+</sup> cells in CD4<sup>+</sup> and CD8<sup>+</sup> T cells. N=5 per group. Bars represent mean ± s.e.m. pIC, poly(I:C); R848, resiquimod.

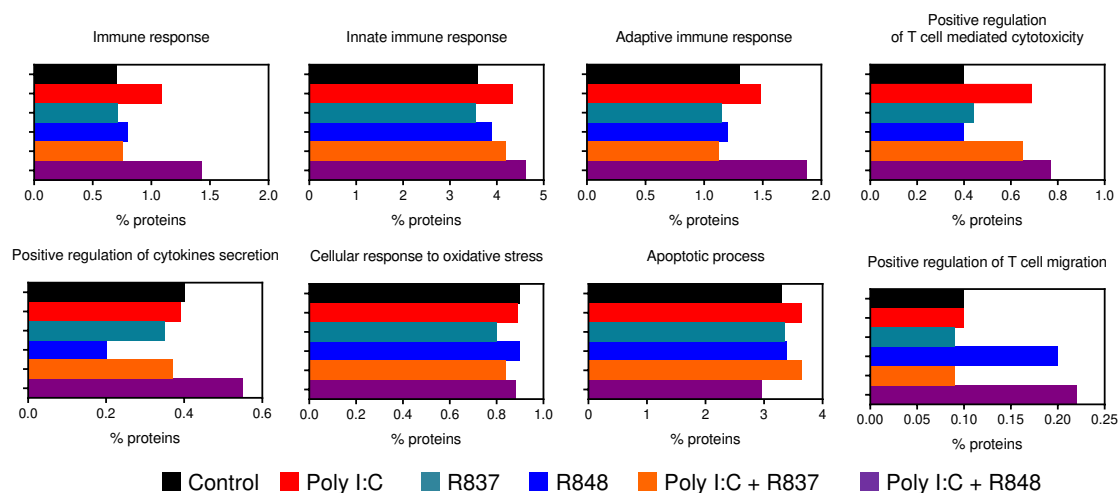

**Supplementary Figure 9. Qualitative proteomic analysis reveals the molecular mediators of antitumor immune responses triggered in TLR treated tumors, N=3 mice per group of treatment.** FunRich functional analysis results of proteins detected for each biological process. Qualitative comparison between groups. pIC, Poly I:C; R837, imiquimod; R848, resiquimod.

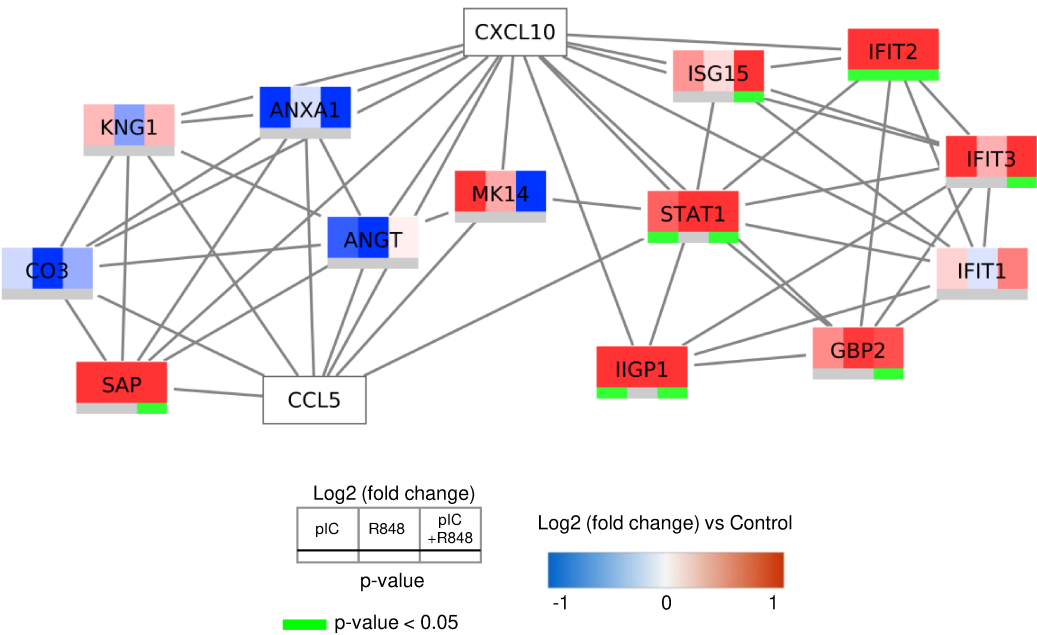

**Supplementary Figure 10. Protein-protein interaction network analysis, with a high-confidence score (> 0.7) for CXCL10 and CCL5 in tumors treated with poly(I:C) (left), R848 (center) and poly(I:C)+R848 (right). Red and blue indicate increased and decreased log2 (fold change) compared to control, respectively. Green color indicates significance (p<0.05).**

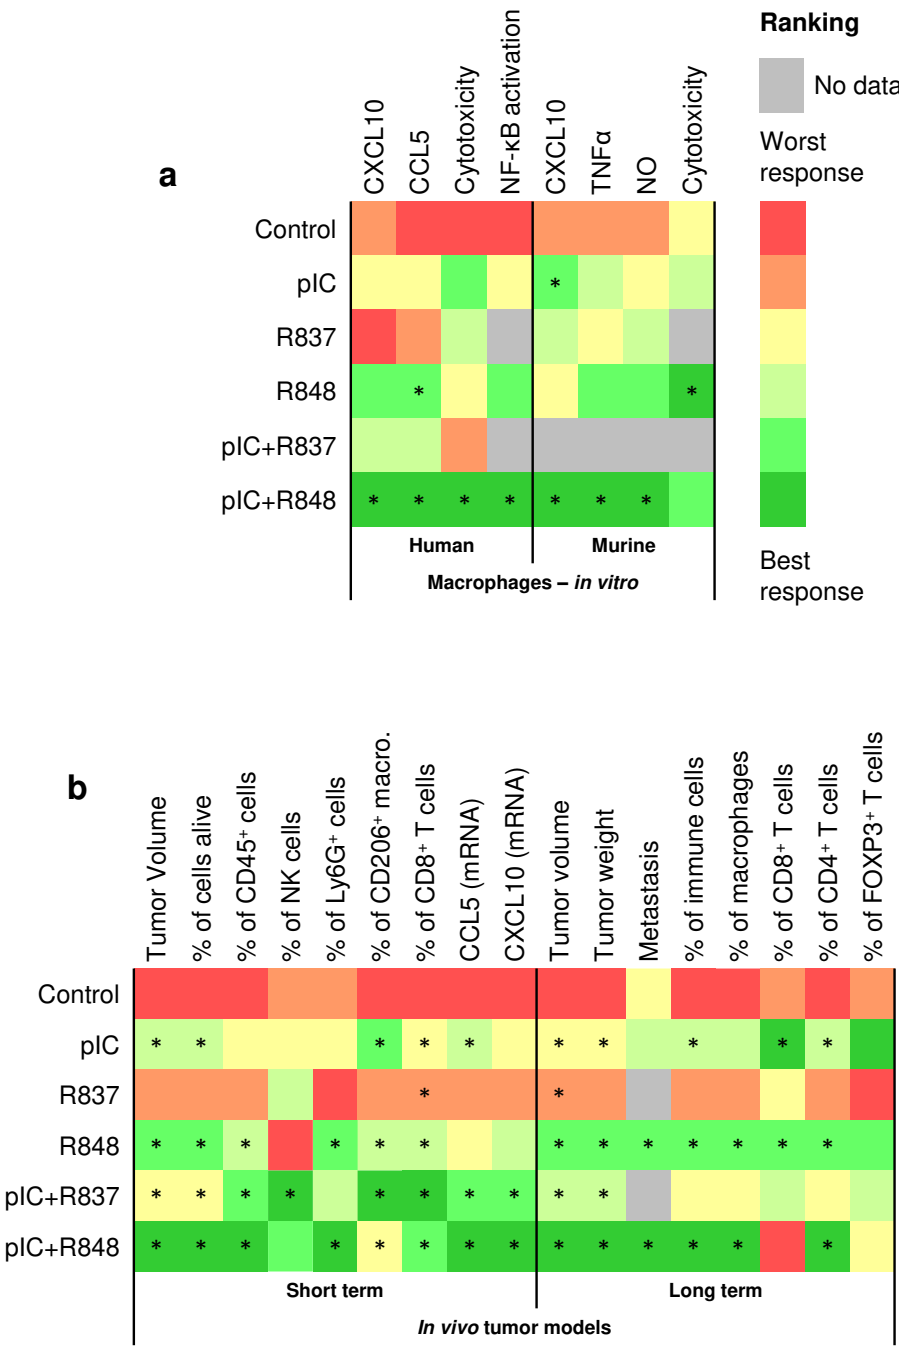

**Supplementary Figure 11. The poly(I:C)+R848 combination induces a superior antitumoral response, versus single treatments or poly(I:C)+R837, through STAT1 activation and macrophage reprogramming.** Comparison of the (a) *in vitro*, (b) short-term and long-term *in vivo* responses to the

TLR-treatments observed in this study. \* indicates treatments that induced a response statistically different *versus* the control ( $p < 0.05$ ).
